# Supplementary material for: Foxc Transcription Factors Directly Regulate Dll4 and Hey2 Expression by Interacting with the VEGF-Notch Signaling Pathways in Endothelial Cells
Source: PubMed Central journal article supplement (PMC2398774; doi:10.1371/journal.pone.0002401), 2008-06-11

**Figure S1**

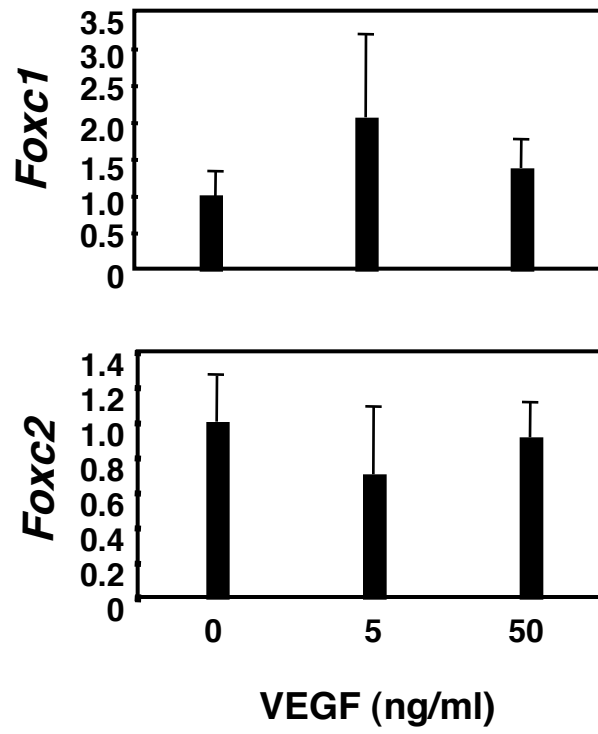

Supplement: pone.0002401.s001.pdf [file pone.0002401.s001.pdf]
